# Supplementary material for: NCSTN promotes hepatocellular carcinoma cell growth and metastasis via β-catenin activation in a Notch1/AKT dependent manner
Source: PubMed Central journal article supplement (PMC7339515; doi:10.1186/s13046-020-01638-3), 2020-07-06

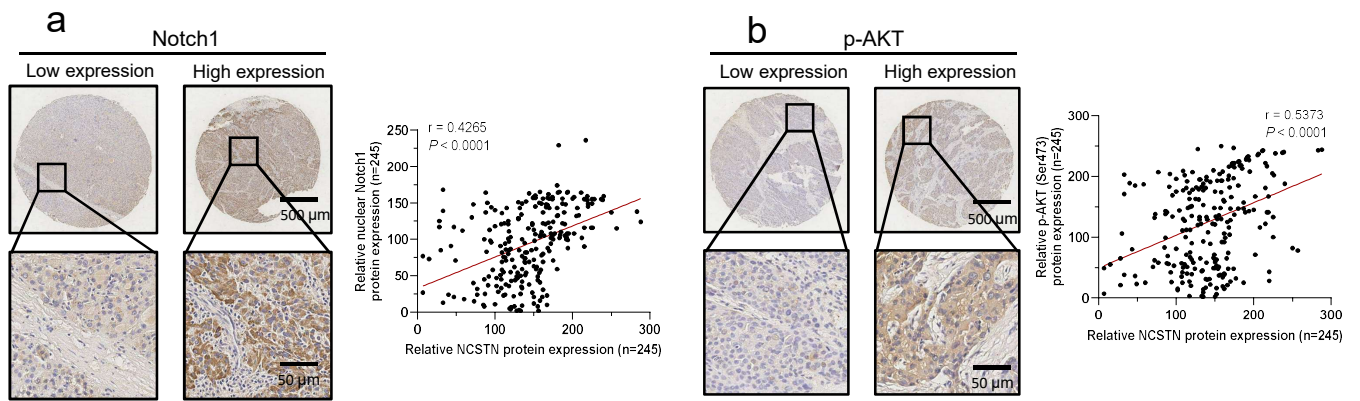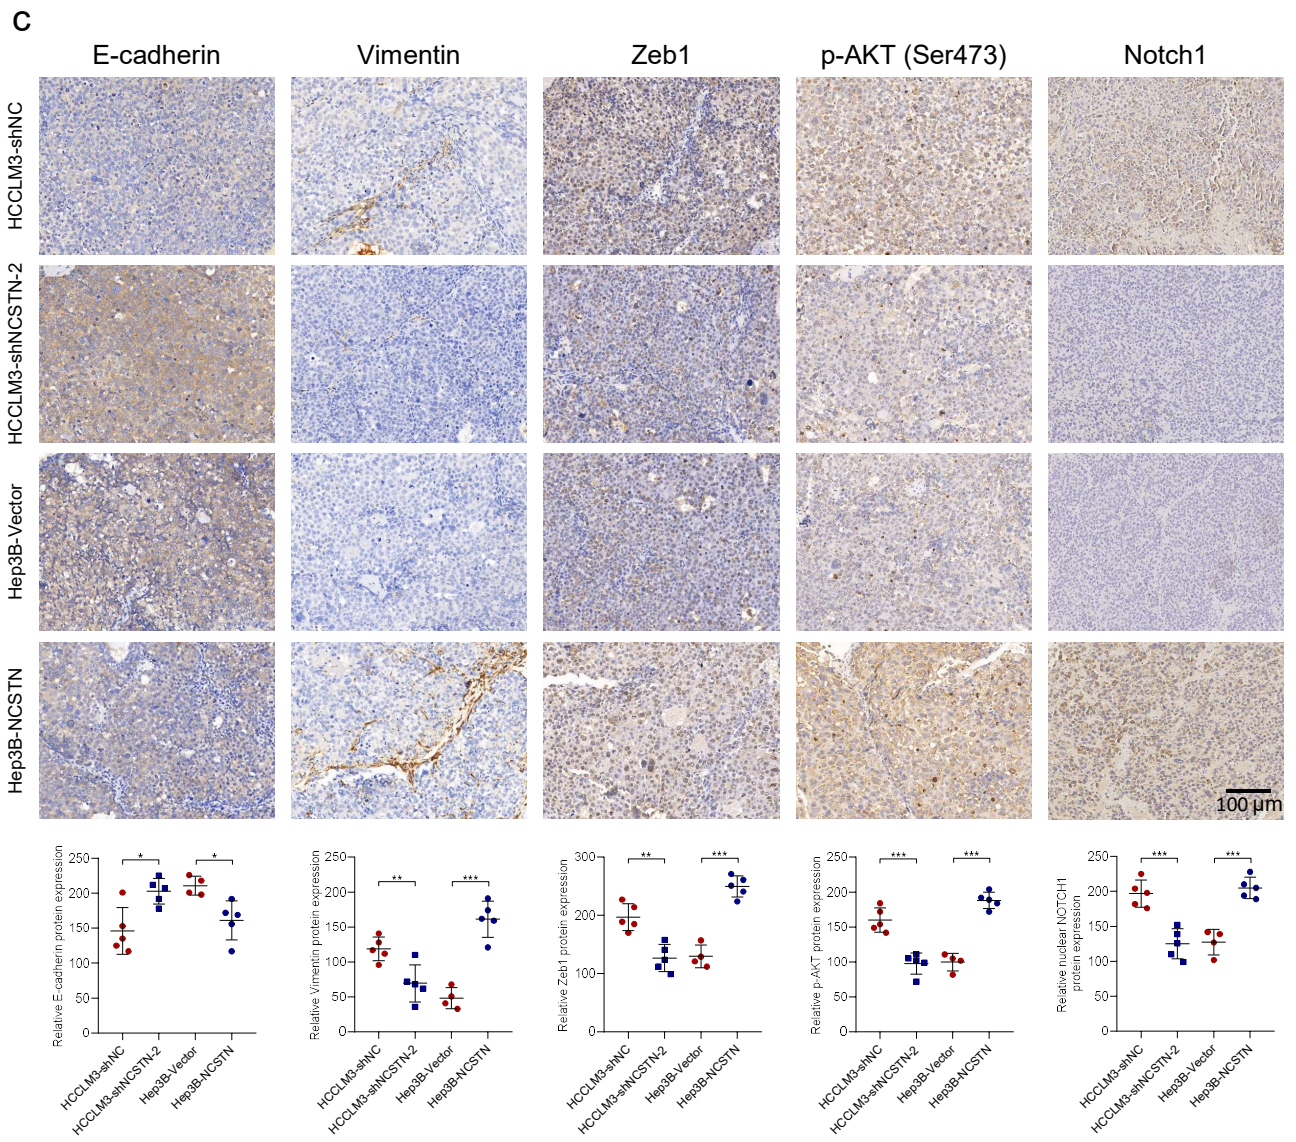

Supplement: 13046_2020_1638_MOESM9_ESM.pdf [file 13046_2020_1638_MOESM9_ESM.pdf]
