# Supplementary material for: NCSTN promotes hepatocellular carcinoma cell growth and metastasis via β-catenin activation in a Notch1/AKT dependent manner
Source: Springer Nature journal article supplement (doi:10.1186/s13046-020-01638-3), 2020-07-06

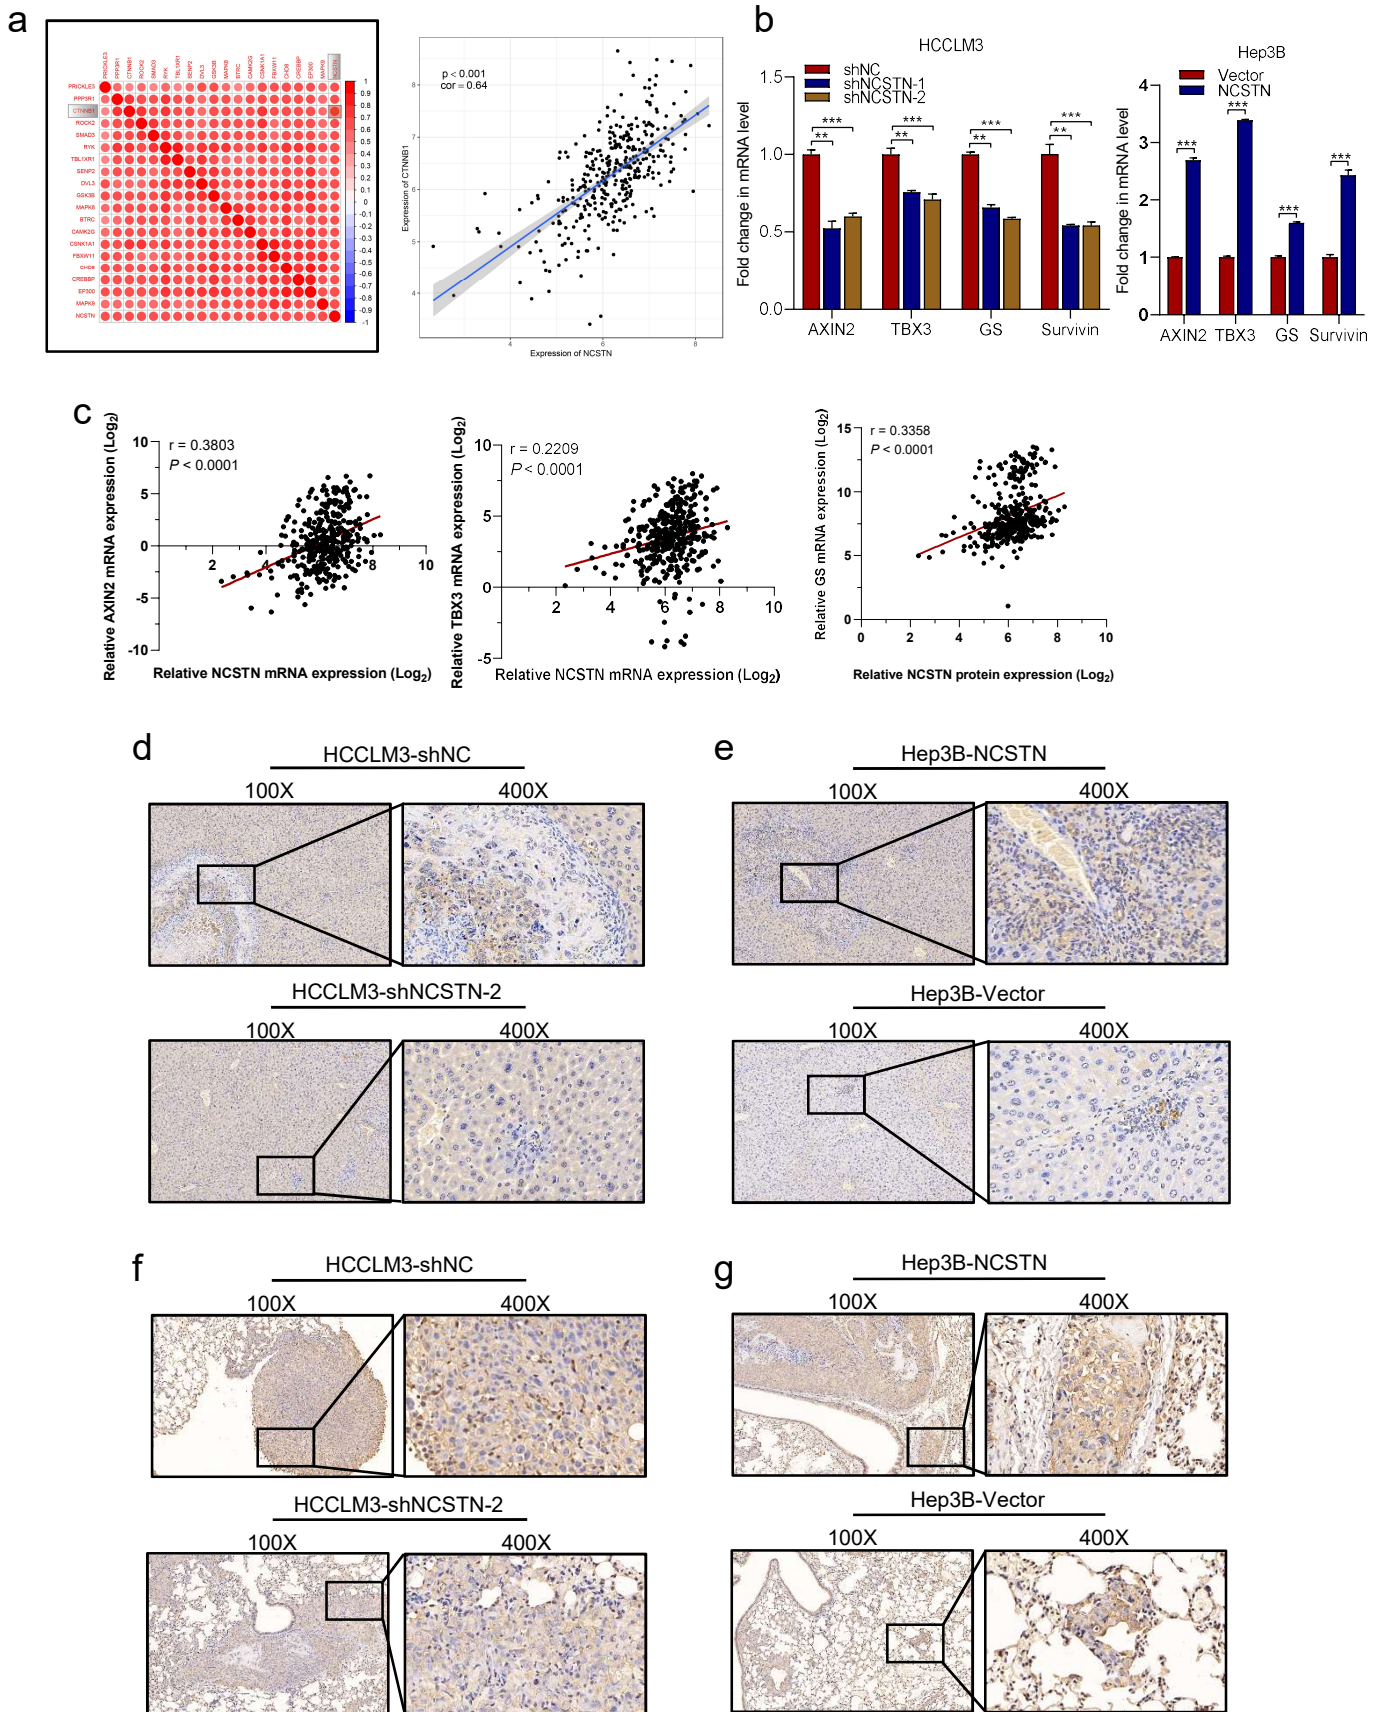

Supplement: MOESM6 [file 18151418]
